# Supplementary material for: Bioinspired hierarchical cross-linked graphene–silicon nanofilms via synergistic interfacial interactions as integrated negative electrodes for high-performance lithium storage
Source: Royal Society of Chemistry journal article supplement (doi:10.1039/c9cp04075g), 2019-12-09
Supplement: c9cp04075g1.pdf [file c9cp04075g1.pdf]

Electronic Supplementary Material (ESI) for Physical Chemistry Chemical Physics.

## Supporting Information

Bioinspired hierarchical cross-linked graphene-silicon nanofilms  
via synergistic interfacial interactions as integrated negative  
electrodes for high-performance lithium storage

Bo Wang,<sup>\*a</sup> Xiaoyu Wu,<sup>b</sup> Jinhui Zhang,<sup>a</sup> Xiaoyu Zhang,<sup>a</sup> and Songmei Li<sup>\*b</sup>

<sup>a</sup> Department of Environmental and Chemical Engineering, Tangshan University,  
Tangshan 063000, P. R. China.

<sup>b</sup> Key Laboratory of Aerospace Advanced Materials and Performance of Ministry of  
Education, School of Materials Science and Engineering, Beihang University, Beijing,  
100191, P. R. China

\* Corresponding author. Tel: +86-315-2010649; Fax: +86-315-2010649.

E-mail address: wangbo@buaa.edu.cn.

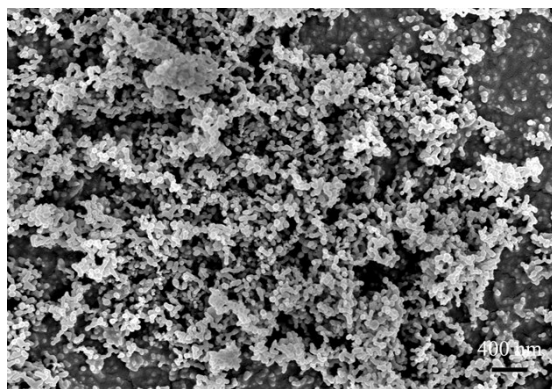

**Fig. S1** The SEM image of the Si nanoparticles powders.

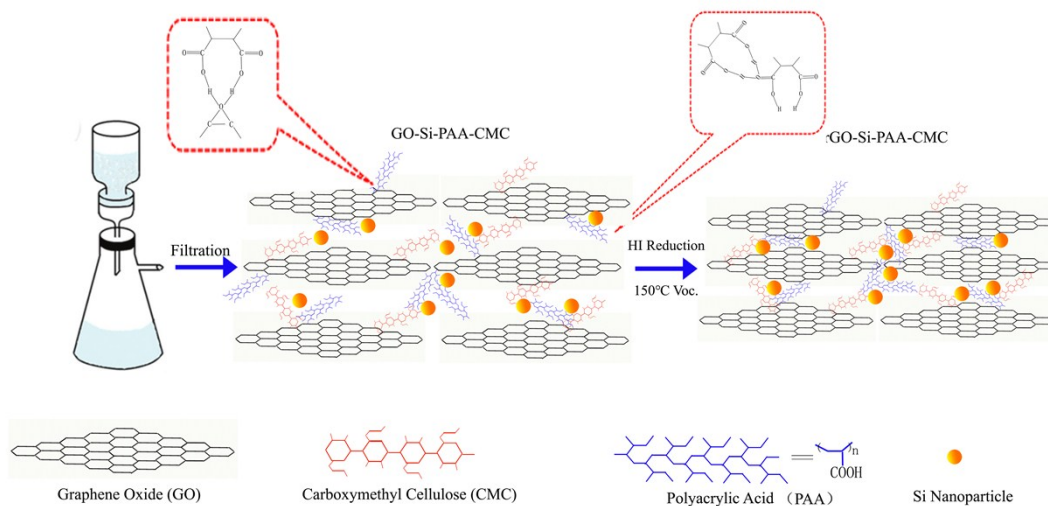

**Fig. S2** Schematic illustration of the synthesis process of rGO-Si-CMC-PAA films.

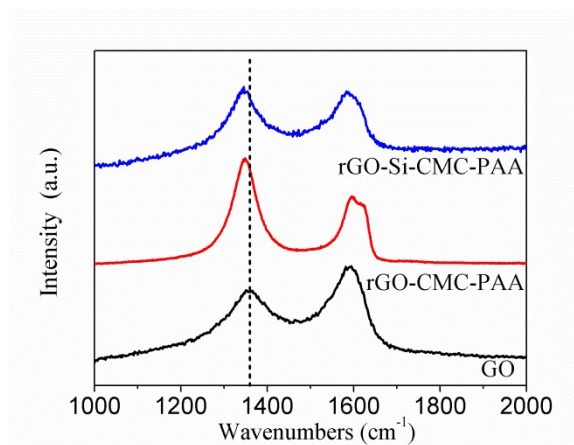

**Fig. S3** The enlargement of Raman spectra of as-prepared GO and rGO-Si-CMC-PAA films.

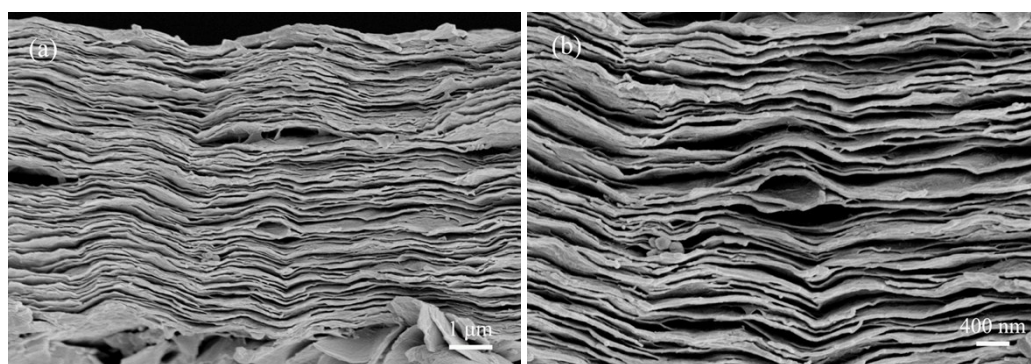

**Fig. S4** (a-b) SEM images of the as-prepared rGO-CMC-PAA nanocomposites at different magnifications.

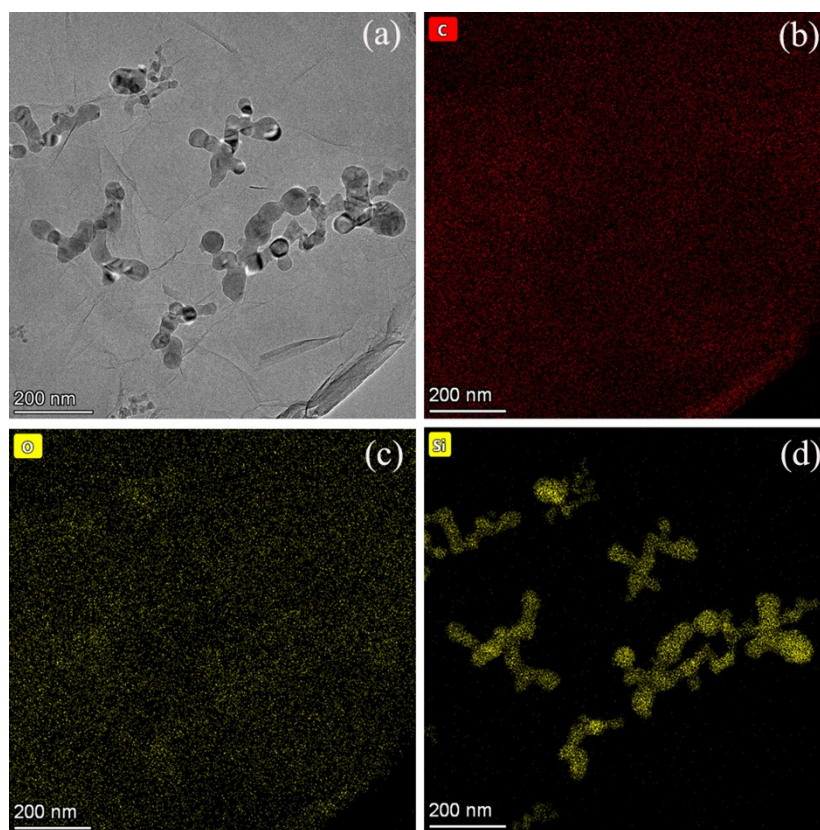

**Fig. S5** (a) TEM and (b-d) corresponding element mappings of rGO-Si-CMC-PAA films.

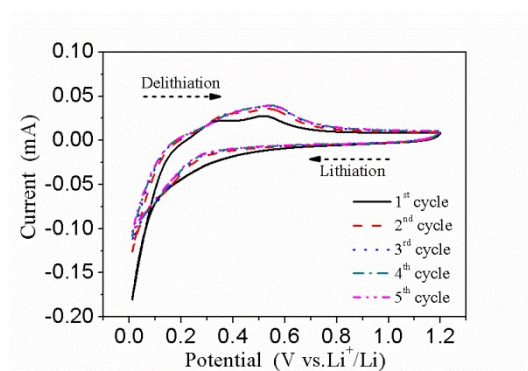

**Fig. S6** Cyclic voltammograms of Si NPs powder pasted electrode for the initial five cycles at a scan rate of  $0.1 \text{ mV s}^{-1}$  in the voltage range of 0.01-1.2 V.

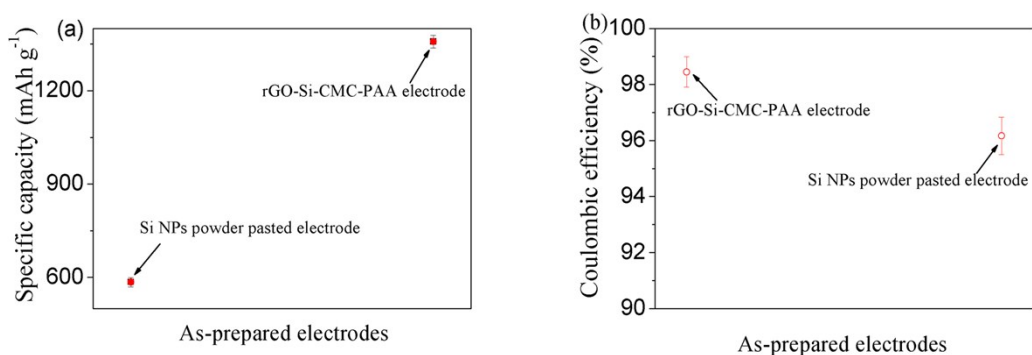

**Fig. S7** (a) The specific capacity and (b) Coulombic efficiency of conventional Si NPs powder pasted electrode and rGO-Si-CMC-PAA electrodes at the current density of 0.1C after 800 cycles; the scatter bands in the plots are standard deviations calculated from 10 parallel electrodes.

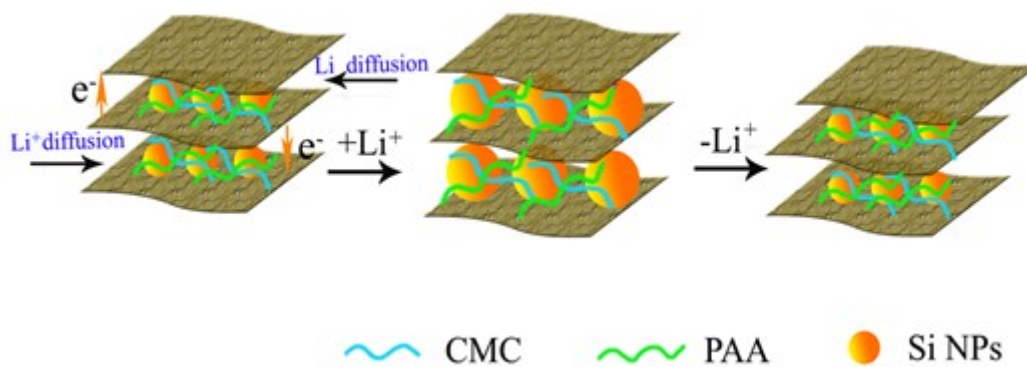

**Fig. S8** Possible working mechanism of rGO-Si-CMC-PAA electrode to accommodate the considerable volume change of Si particles during cycling.

**Table S1** The elemental composition of the rGO-Si-CMC-PAA films from the EDS  
(Fig. 3h) .

| <i>Elem</i> | <i>Weight %</i> | <i>Atomic %</i> |
|-------------|-----------------|-----------------|
| <i>C K</i>  | 45.86           | 49.69           |
| <i>O K</i>  | 11.05           | 14.19           |
| <i>Si K</i> | 43.09           | 36.12           |
